# Supplementary material
Source: MDPI journal article supplement (https://www.mdpi.com/2673-401X/3/4/34)
Supplement: s1 [file s1]

## Supplementary Materials

### **Bis(3-methylthio-1-azulenyl)phenylmethyl Cations and Dications Connected by 1,4-Phenylene Spacer: Synthesis and their Electrochemical Properties**

Taku Shoji\*, Naoko Sakata, Ryuta Sekiguchi, and Shunji Ito

#### ➤ *Contents*

1. Copies of  $^1\text{H}$  NMR,  $^{13}\text{C}$  NMR, and COSY of **3a,b<sup>+</sup>·PF<sub>6</sub><sup>-</sup>** and **4a,b<sup>2+</sup>·2PF<sub>6</sub><sup>-</sup>** (Figures S1–S12).
2. UV/Vis spectra of **3a,b<sup>+</sup>·PF<sub>6</sub><sup>-</sup>** and **4a,b<sup>2+</sup>·2PF<sub>6</sub><sup>-</sup>** (Figures S13–S15).
3. Continuous change in the visible spectra and their photos of **3a,b<sup>+</sup>·PF<sub>6</sub><sup>-</sup>** and **4a,b<sup>2+</sup>·2PF<sub>6</sub><sup>-</sup>** (Figures S16–S19).
4. Cyclic voltammograms of **3a,b<sup>+</sup>·PF<sub>6</sub><sup>-</sup>** and **4a,b<sup>2+</sup>·2PF<sub>6</sub><sup>-</sup>** (Figures S20–S22).

1. Copies of  $^1\text{H}$  NMR,  $^{13}\text{C}$  NMR, and COSY of  $3\text{a}, \text{b}^+ \cdot \text{PF}_6^-$  and  $4\text{a}, \text{b}^{2+} \cdot 2\text{PF}_6^-$  (Figures S1–S12).

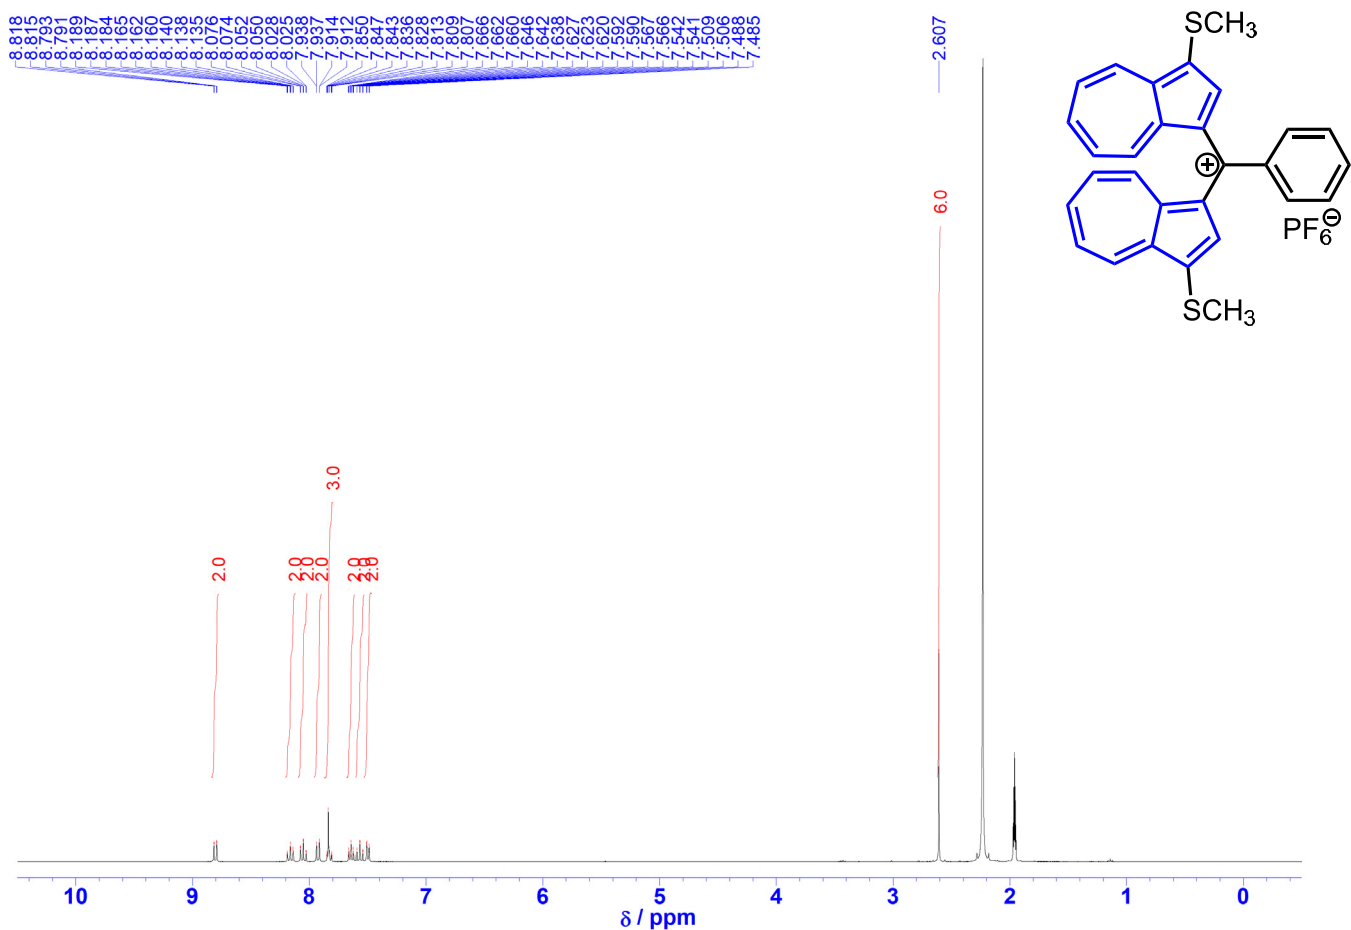

Figure S1.  $^1\text{H}$  NMR spectrum of  $3\text{a}^+ \cdot \text{PF}_6^-$  in  $\text{CD}_3\text{CN}$  (400 MHz).

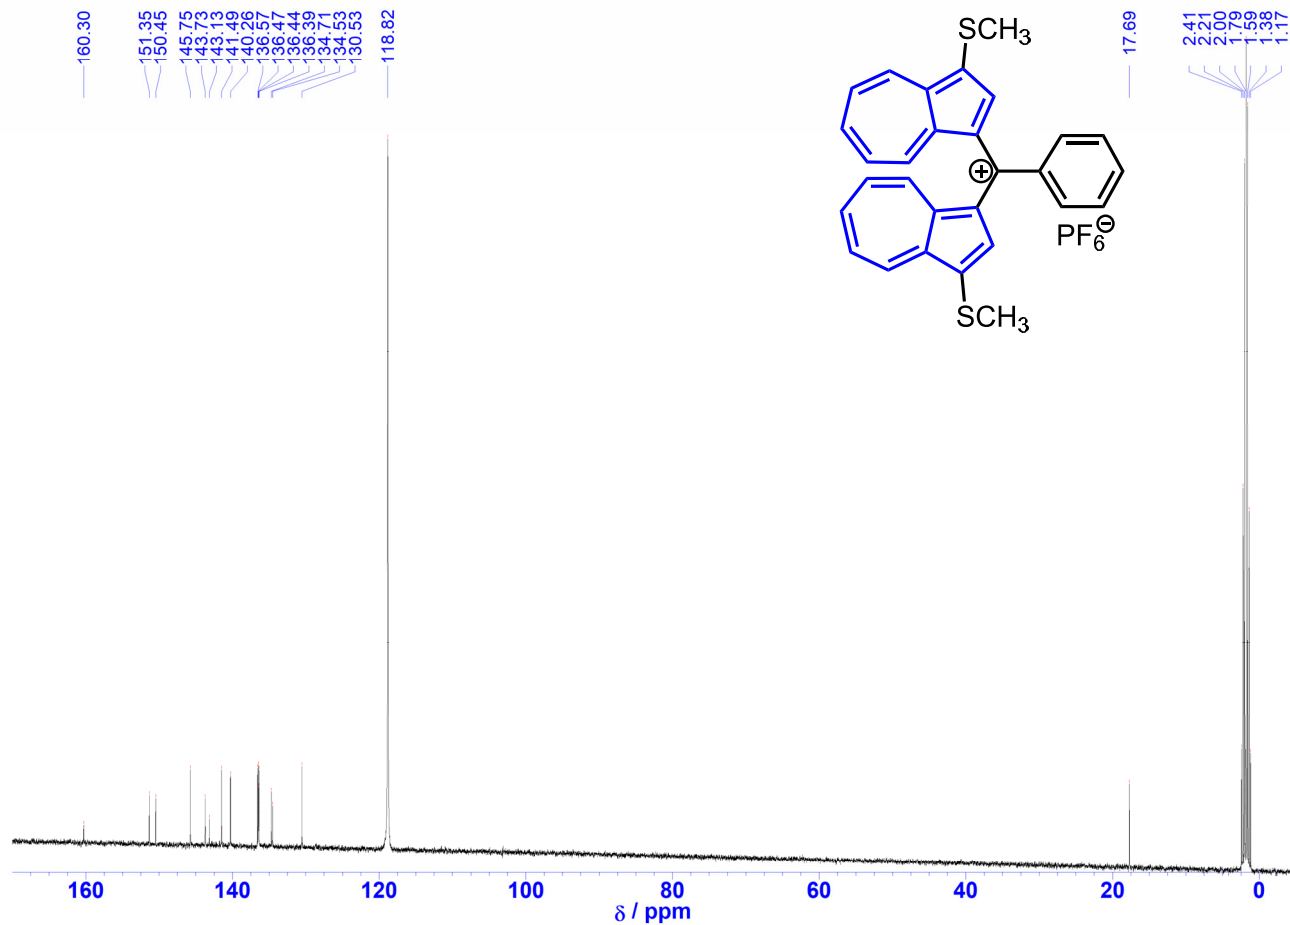

Figure S2.  $^{13}\text{C}$  NMR spectrum of  $3\text{a}^+ \cdot \text{PF}_6^-$  in  $\text{CD}_3\text{CN}$  (100 MHz).

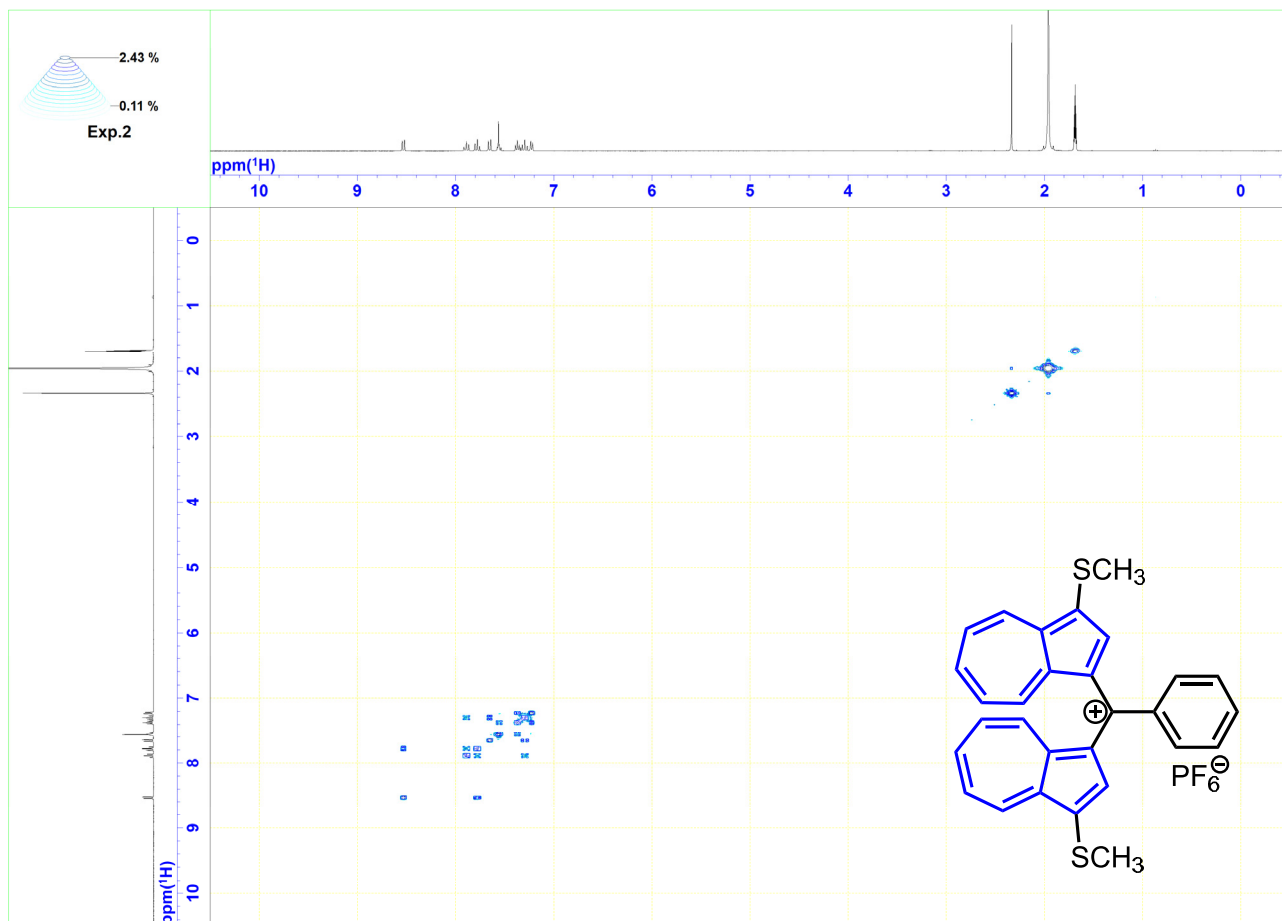

**Figure S3.** COSY spectrum of **3a**<sup>+</sup>•PF<sub>6</sub><sup>-</sup> in CD<sub>3</sub>CN (400 MHz).

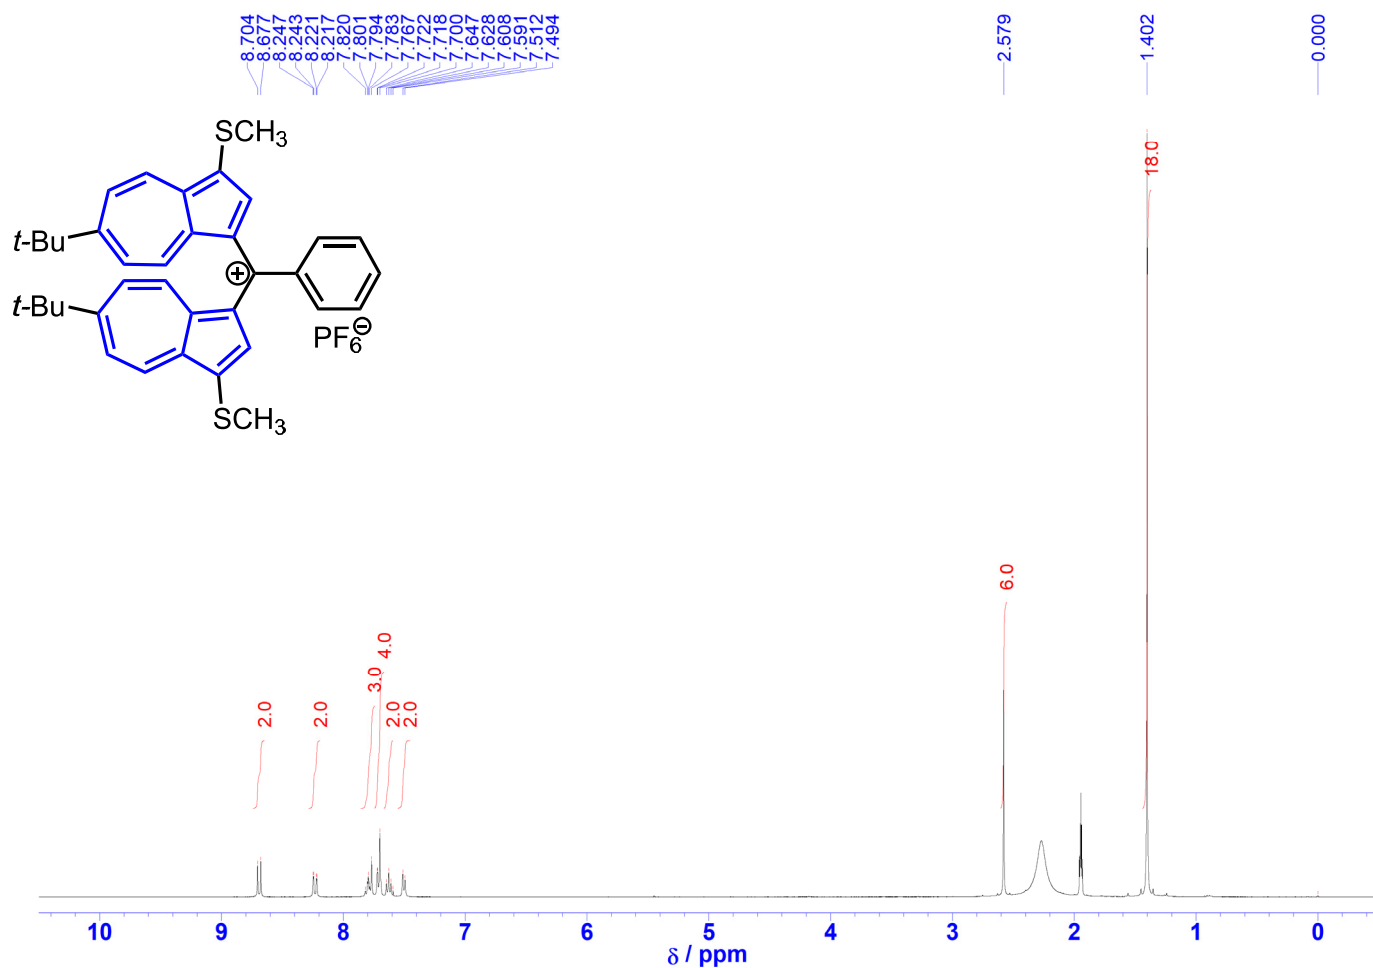

Figure S4. <sup>1</sup>H NMR spectrum of **3b**<sup>+</sup>·PF<sub>6</sub><sup>−</sup> in CD<sub>3</sub>CN (400 MHz).

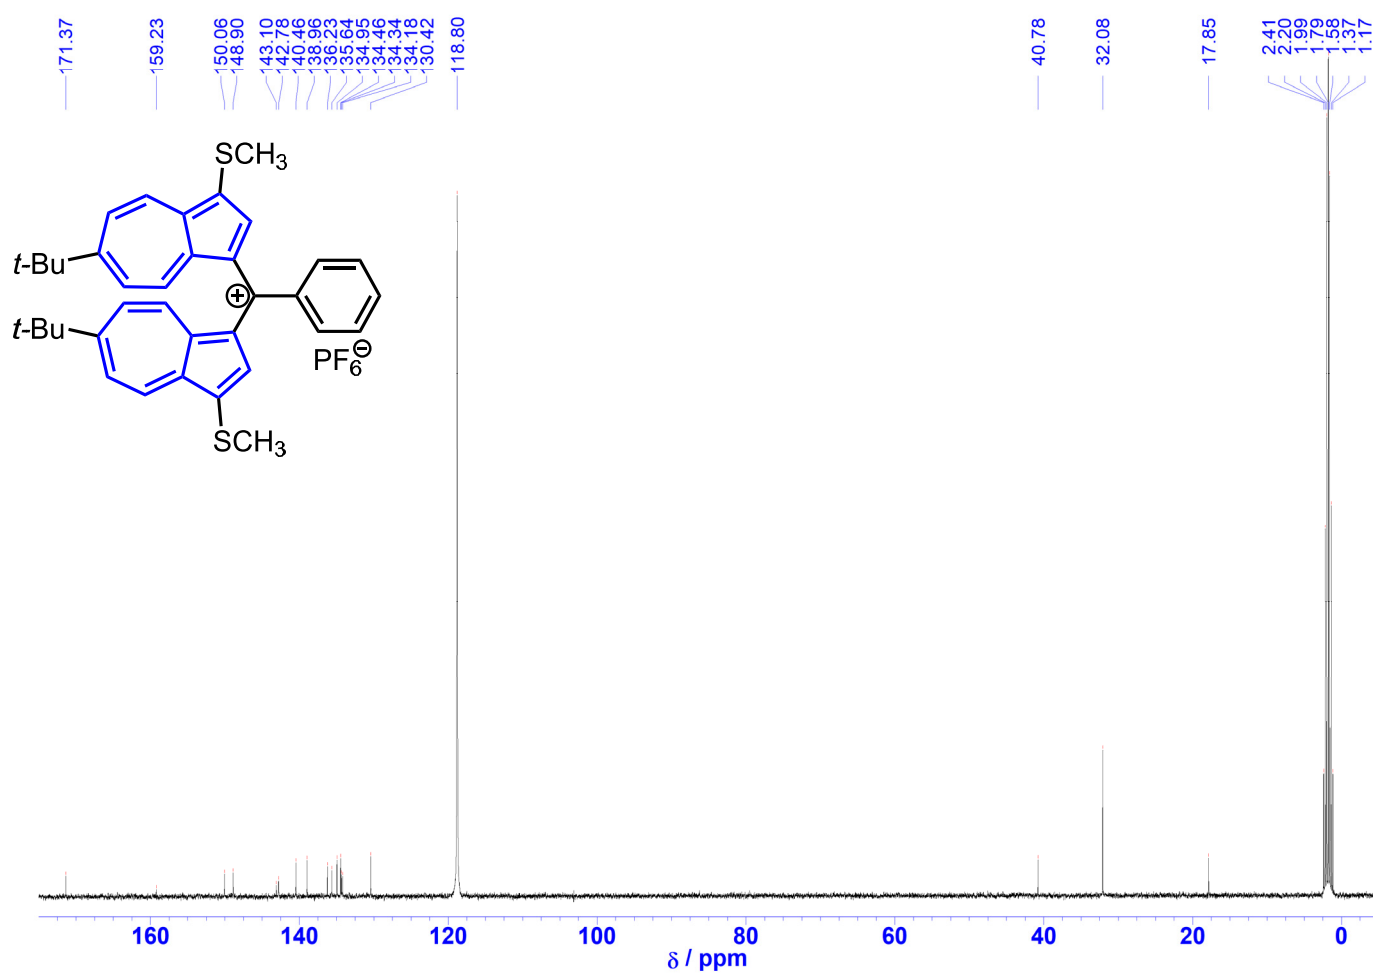

Figure S5. <sup>13</sup>C NMR spectrum of **3b**<sup>+</sup>·PF<sub>6</sub><sup>−</sup> in CD<sub>3</sub>CN (100 MHz).

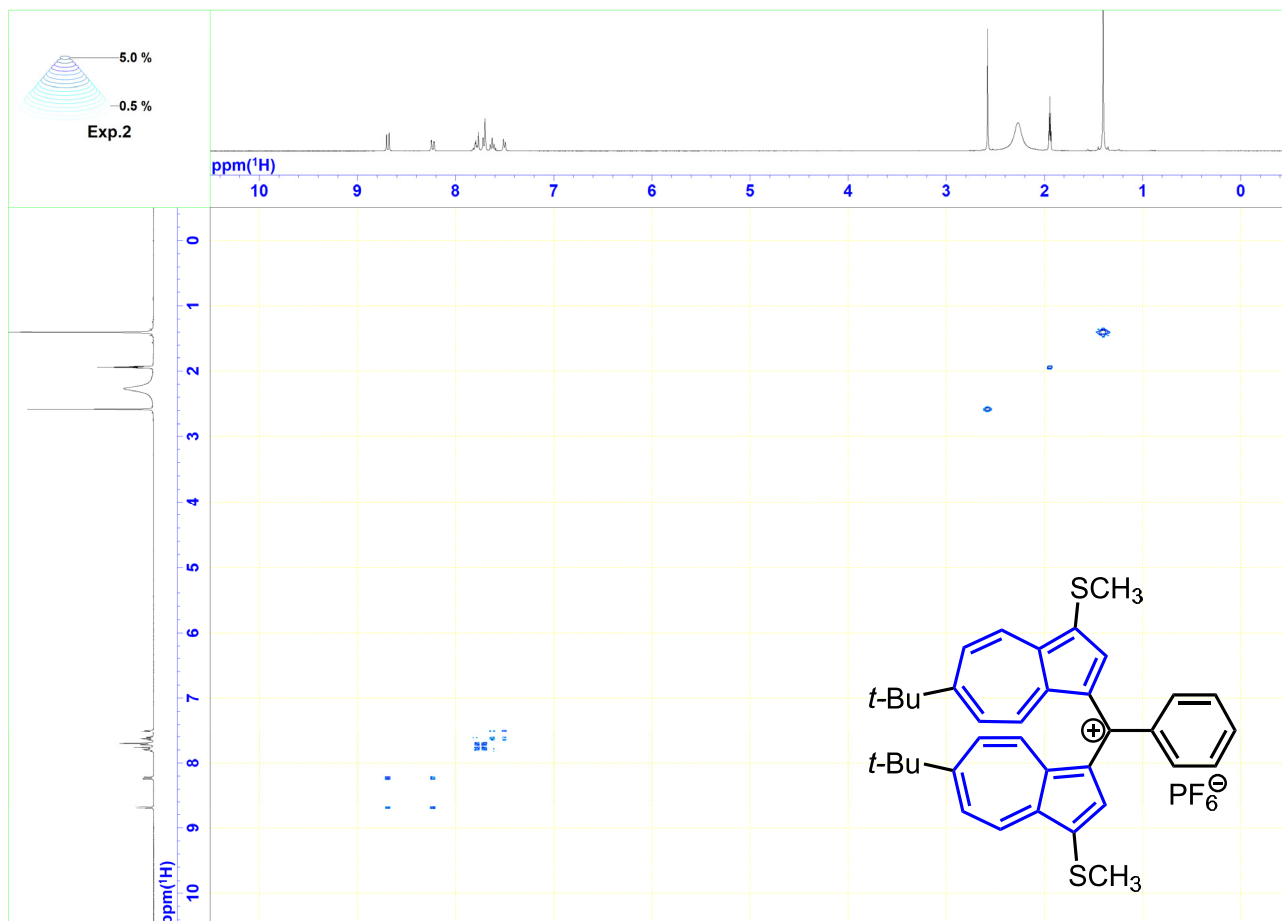

**Figure S6.** COSY spectrum of **3b**<sup>+</sup>•PF<sub>6</sub><sup>-</sup> in CD<sub>3</sub>CN (400 MHz).

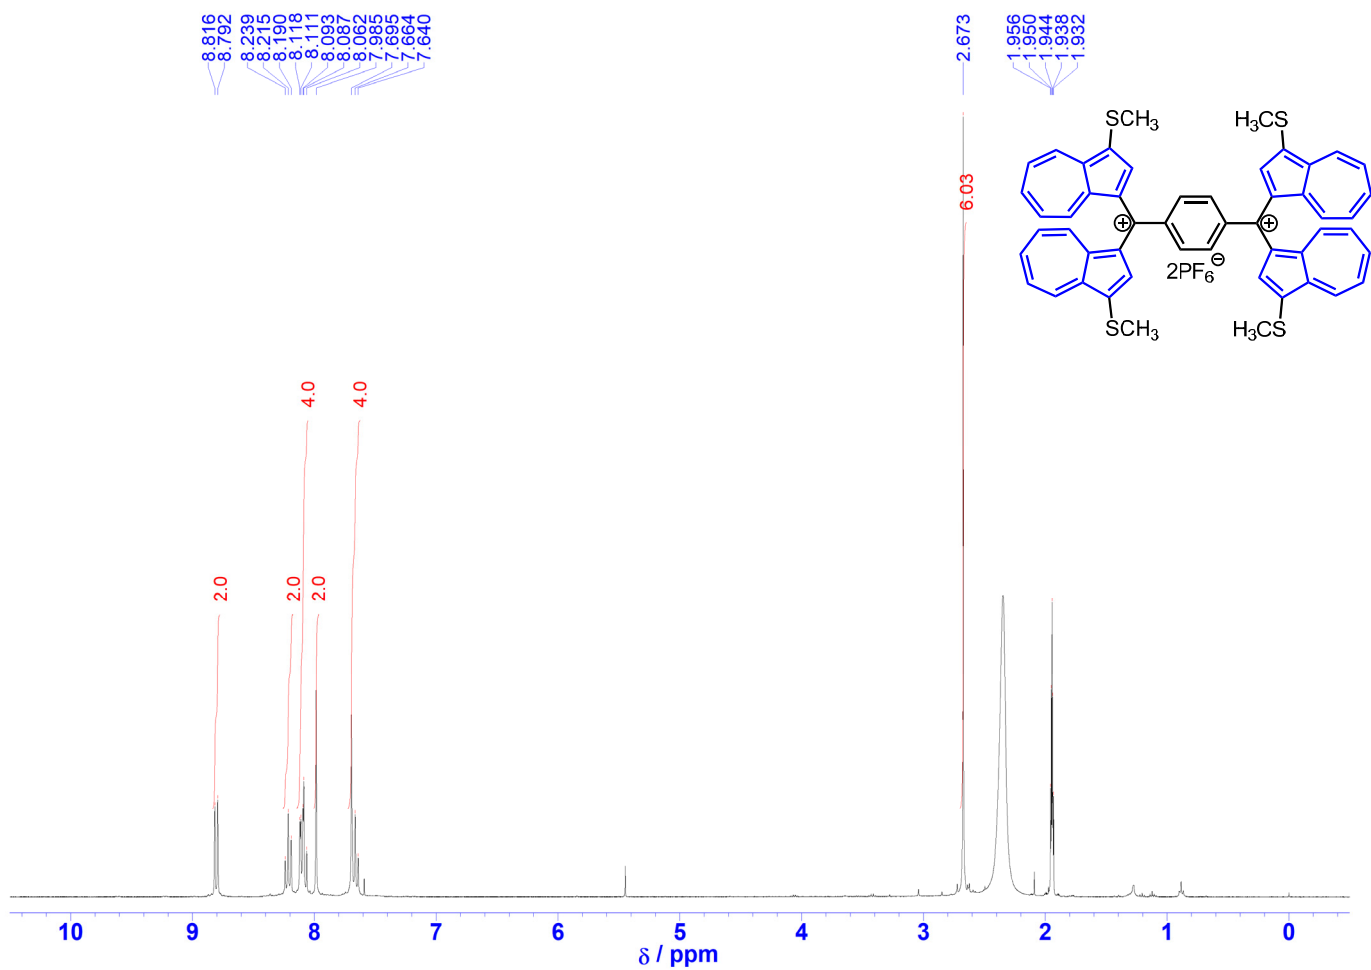

Figure S7. <sup>1</sup>H NMR spectrum of **4a**<sup>2+</sup>·2PF<sub>6</sub><sup>-</sup> in CD<sub>3</sub>CN (400 MHz).

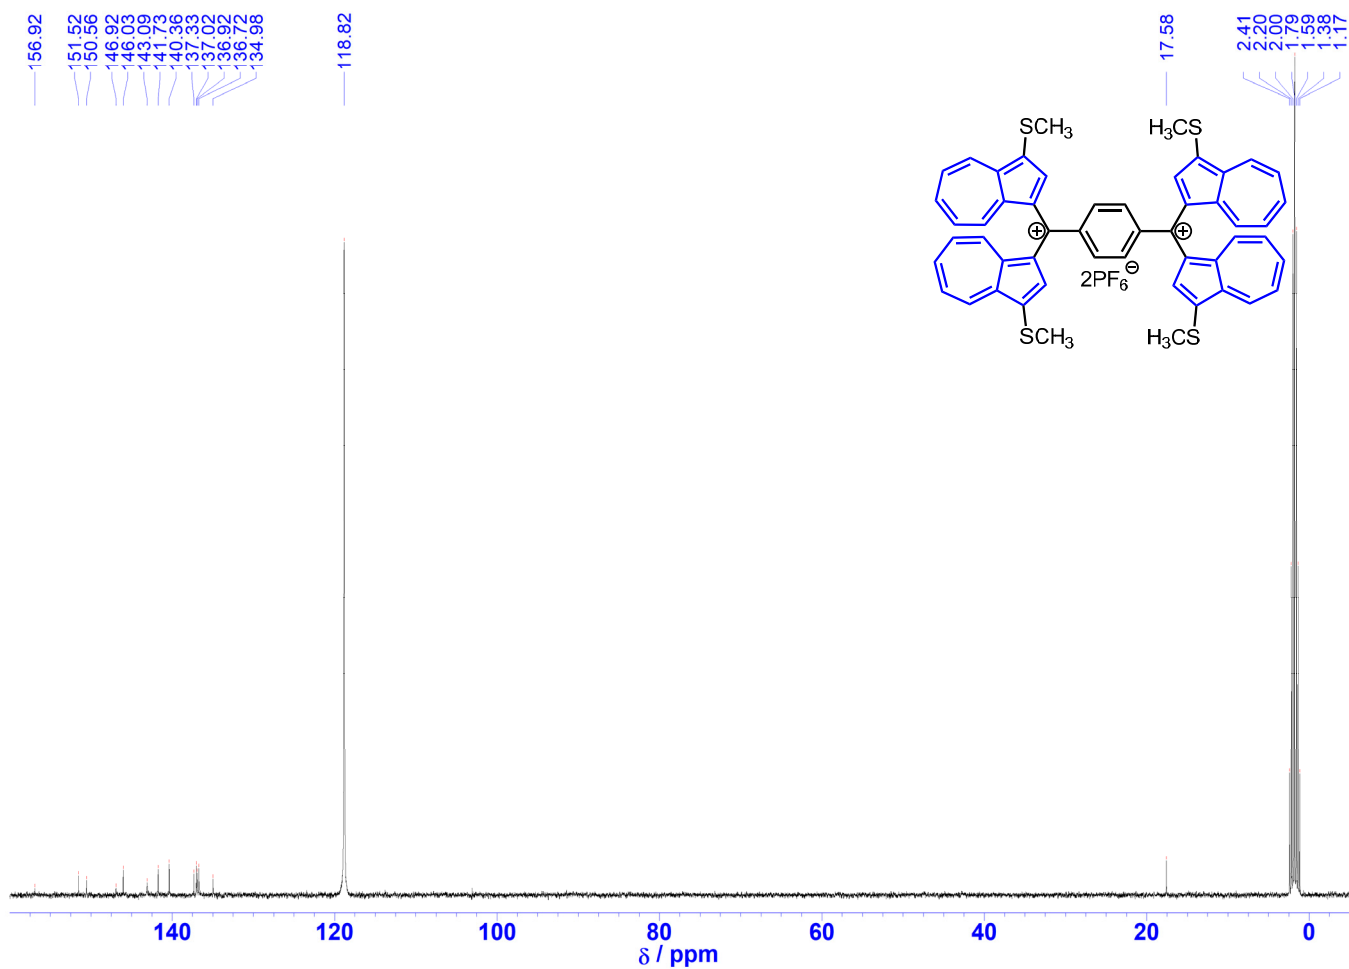

Figure S8. <sup>13</sup>C NMR spectrum of **4a**<sup>2+</sup>·2PF<sub>6</sub><sup>-</sup> in CD<sub>3</sub>CN (100 MHz).

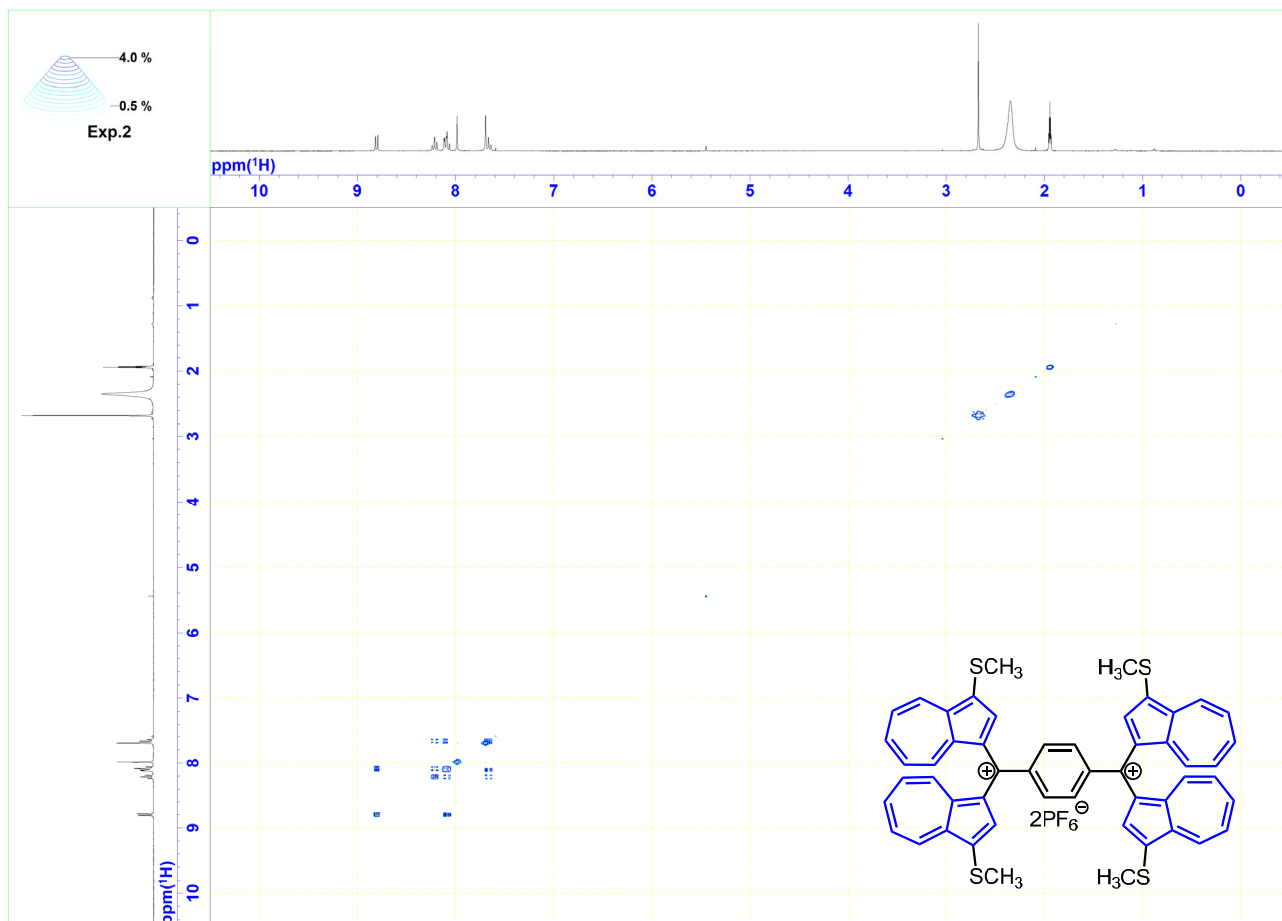

**Figure S9.** COSY spectrum of **4a**<sup>2+</sup>·2PF<sub>6</sub><sup>-</sup> in CD<sub>3</sub>CN (400 MHz).

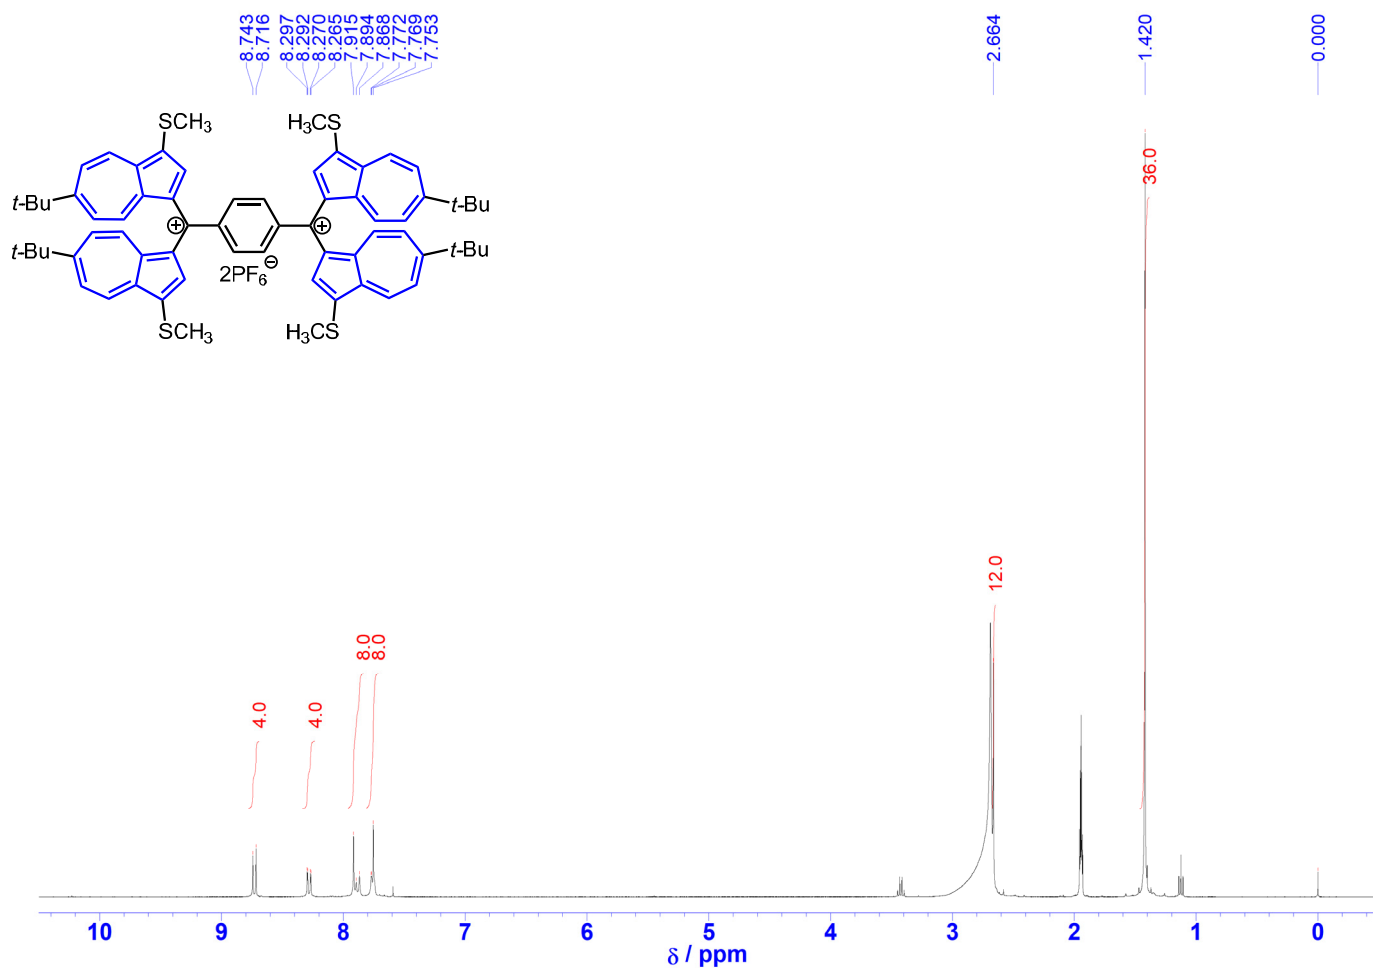

Figure S10.  $^1\text{H}$  NMR spectrum of  $4\text{b}^{2+} \cdot 2\text{PF}_6^-$  in  $\text{CD}_3\text{CN}$  (400 MHz).

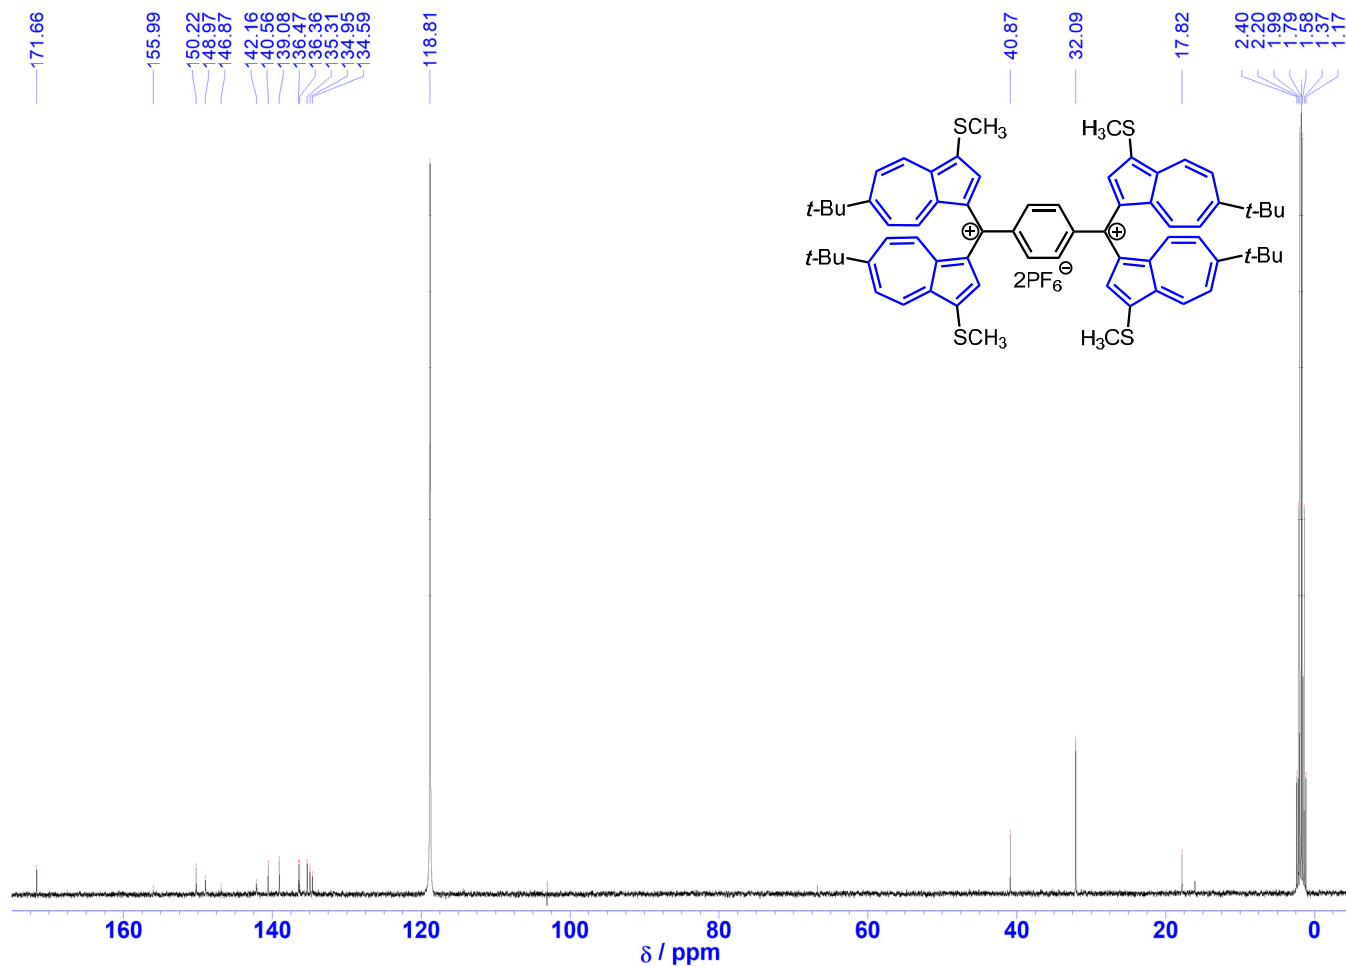

Figure S11.  $^{13}\text{C}$  NMR spectrum of  $4\text{b}^{2+} \cdot 2\text{PF}_6^-$  in  $\text{CD}_3\text{CN}$  (100 MHz).



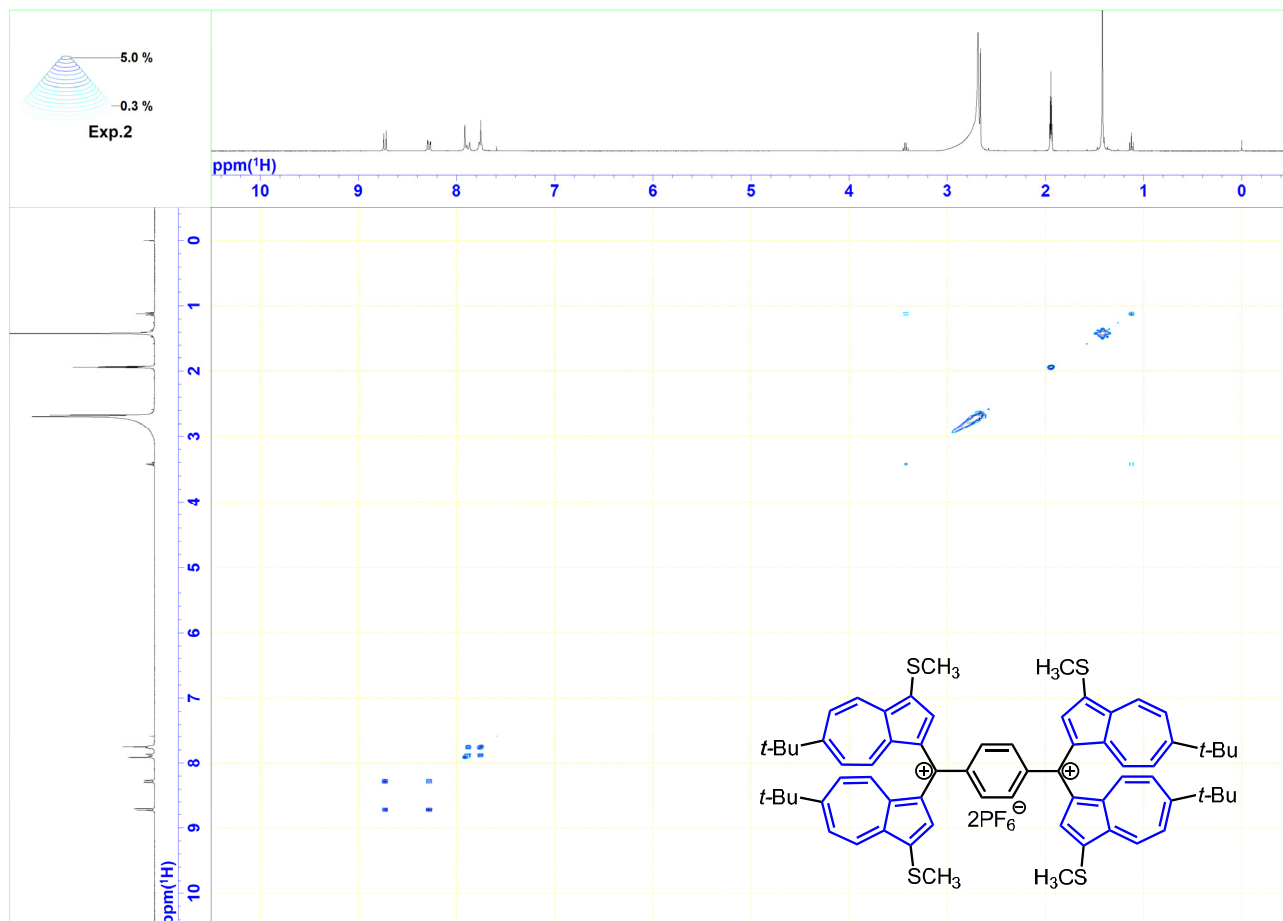

**Figure S12.** COSY spectrum of  $4\mathbf{b}^{2+}\cdot 2\text{PF}_6^-$  in  $\text{CD}_3\text{CN}$  (400 MHz).

2. UV/Vis spectra of  $3a,b^+PF_6^-$  and  $4a,b^{2+} \cdot 2PF_6^-$  (Figures S13–S15).

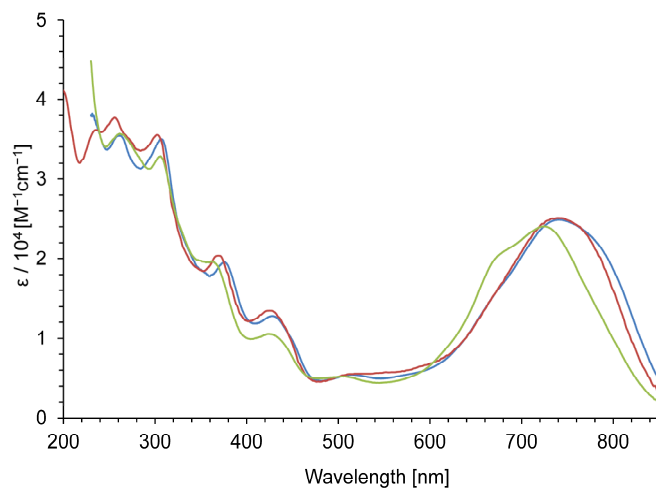

**Figure S13.** UV/Vis spectrum of  $3b^+PF_6^-$  in dichloromethane (blue line), acetonitrile (red line), and hexane (light-green line).

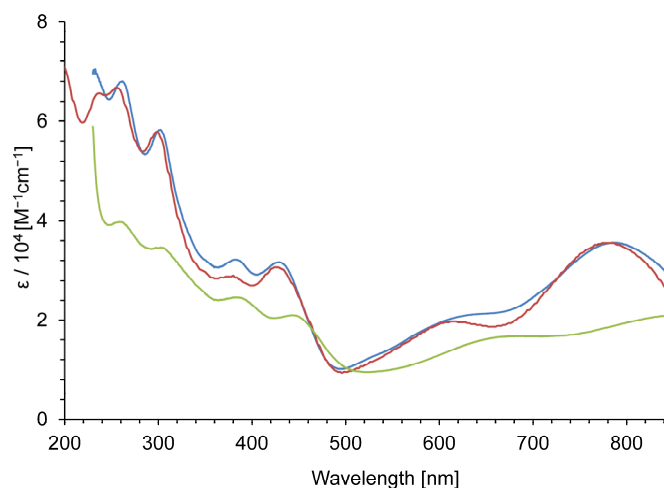

**Figure S14.** UV/Vis spectrum of  $4a^{2+} \cdot 2PF_6^-$  in dichloromethane (blue line), acetonitrile (red line), and hexane (light-green line).

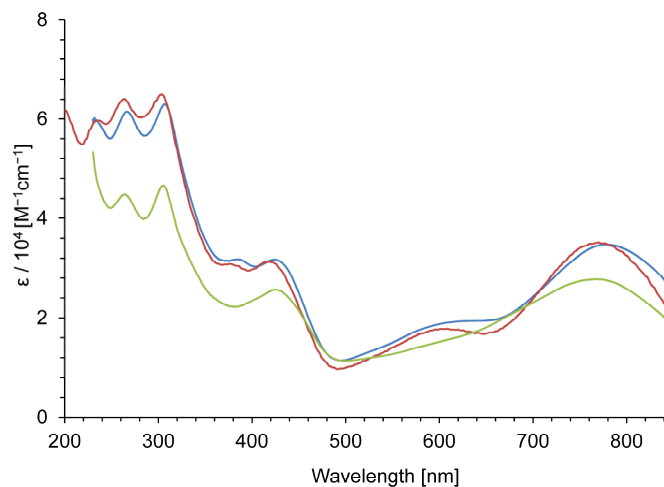

**Figure S15.** UV/Vis spectrum of  $4a^{2+} \cdot 2PF_6^-$  in dichloromethane (blue line), acetonitrile (red line), and hexane (light-green line).

3. Continuous change in the visible spectra and their photos of  $3a, b^+ \cdot PF_6^-$  and  $4a, b^{2+} \cdot 2PF_6^-$  (Figures S16–S19).

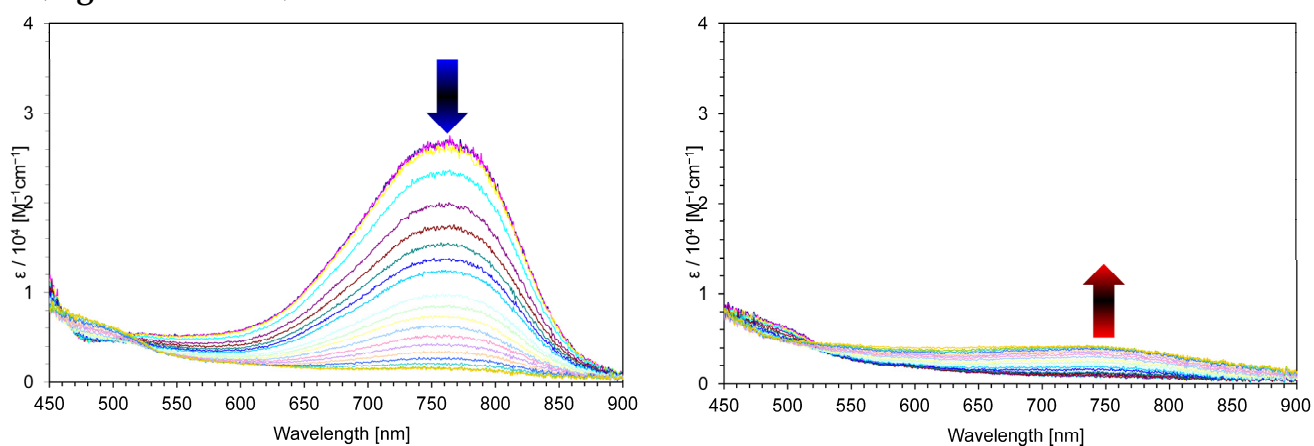

**Figure S16.** Continuous change in visible spectra of  $3b^+ \cdot PF_6^-$  in benzonitrile containing  $Et_4NClO_4$  (0.1 M): constant-current electrochemical reduction (50 uA) at 30 sec intervals (left) and the reverse oxidation (right) of the reduced species (50 uA) at 30 sec intervals.

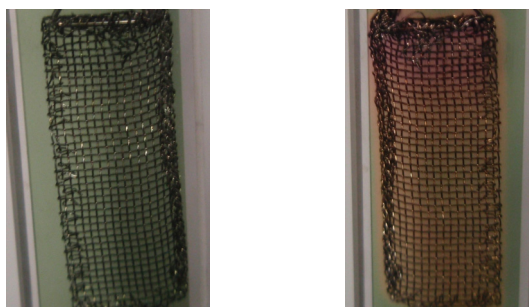

**Figure S17.** Color changes of  $3b^+ \cdot PF_6^-$  upon the electrochromic analysis in benzonitrile containing  $Et_4NClO_4$  (0.1 M) upon (50 uA): before electrochemical reduction (left) and after electrochemical reduction (right).

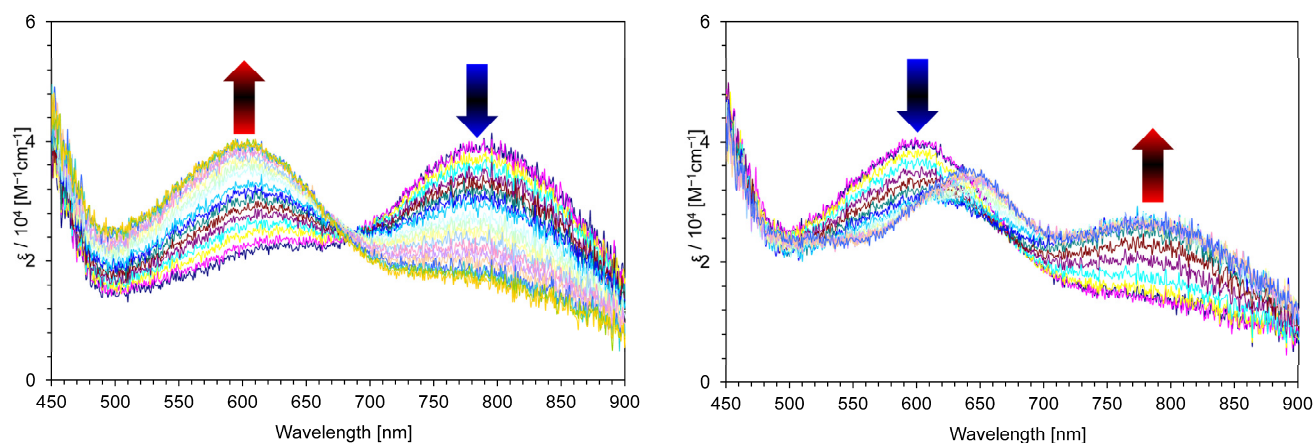

**Figure S18.** Continuous change in visible spectra of  $4a^{2+} \cdot 2PF_6^-$  in benzonitrile containing  $Et_4NClO_4$  (0.1 M): constant-current electrochemical reduction (50 uA) at 30 sec intervals (left) and the reverse oxidation (right) of the reduced species (50 uA) at 30 sec intervals.

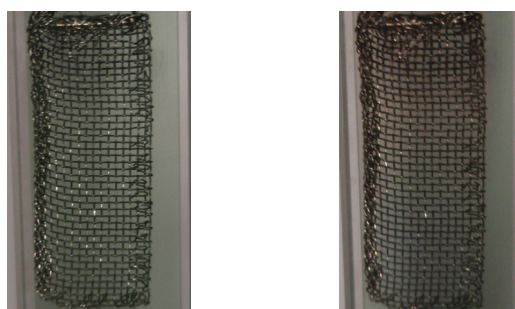

**Figure S19.** Color changes of  $4a^{2+} \cdot 2PF_6^-$  upon the electrochromic analysis in benzonitrile containing  $Et_4NClO_4$  (0.1 M) upon (50 uA): before electrochemical reduction (left) and after electrochemical reduction (right).

#### 4. Cyclic voltammograms of $3a,b^{+}PF_6^{-}$ and $4a,b^{2+}2PF_6^{-}$ (Figures S20–S22).

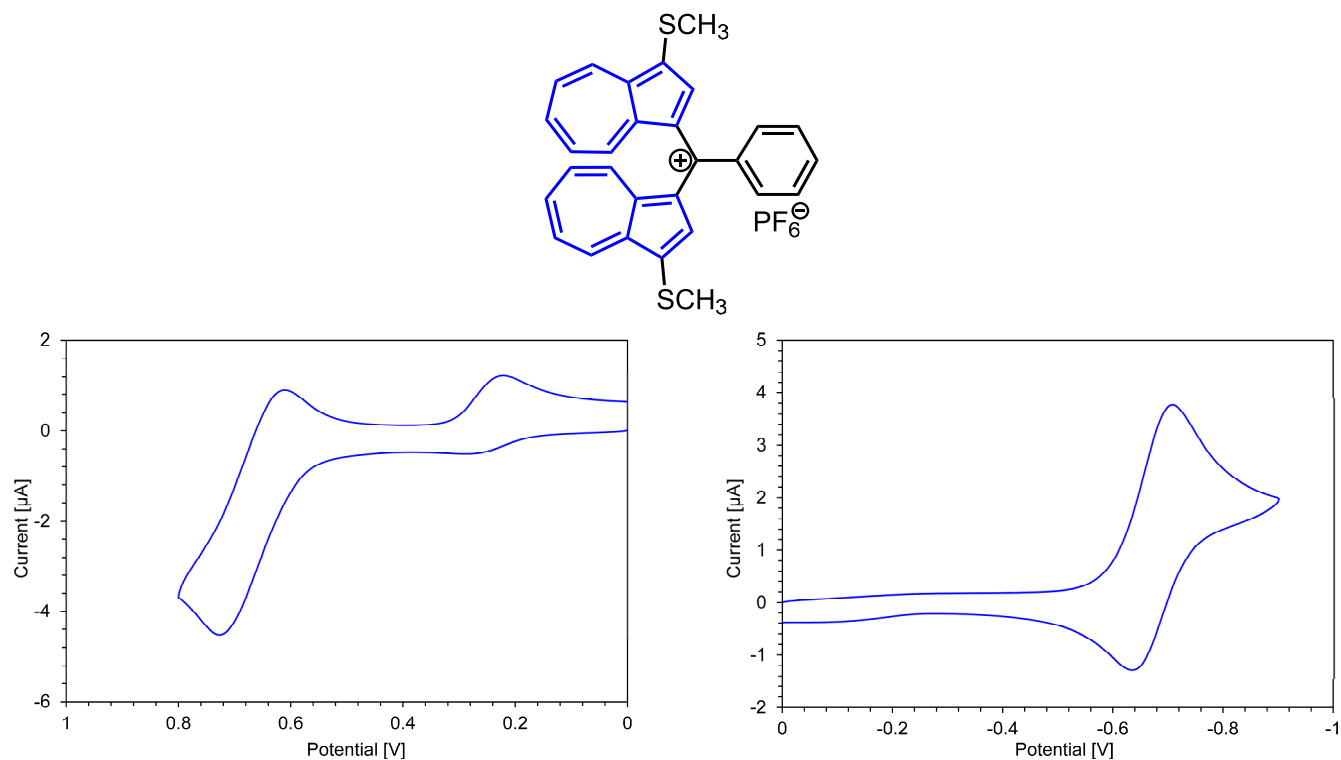

**Figure S20.** Cyclic voltammogram for oxidation (left) and reduction (right) of  $3a^{2+} \cdot 2PF_6^{-}$  (1 mM) in benzonitrile containing  $Et_4NClO_4$  (0.1 M) as the supporting electrolyte; scan rate =  $100 \text{ mVs}^{-1}$ .

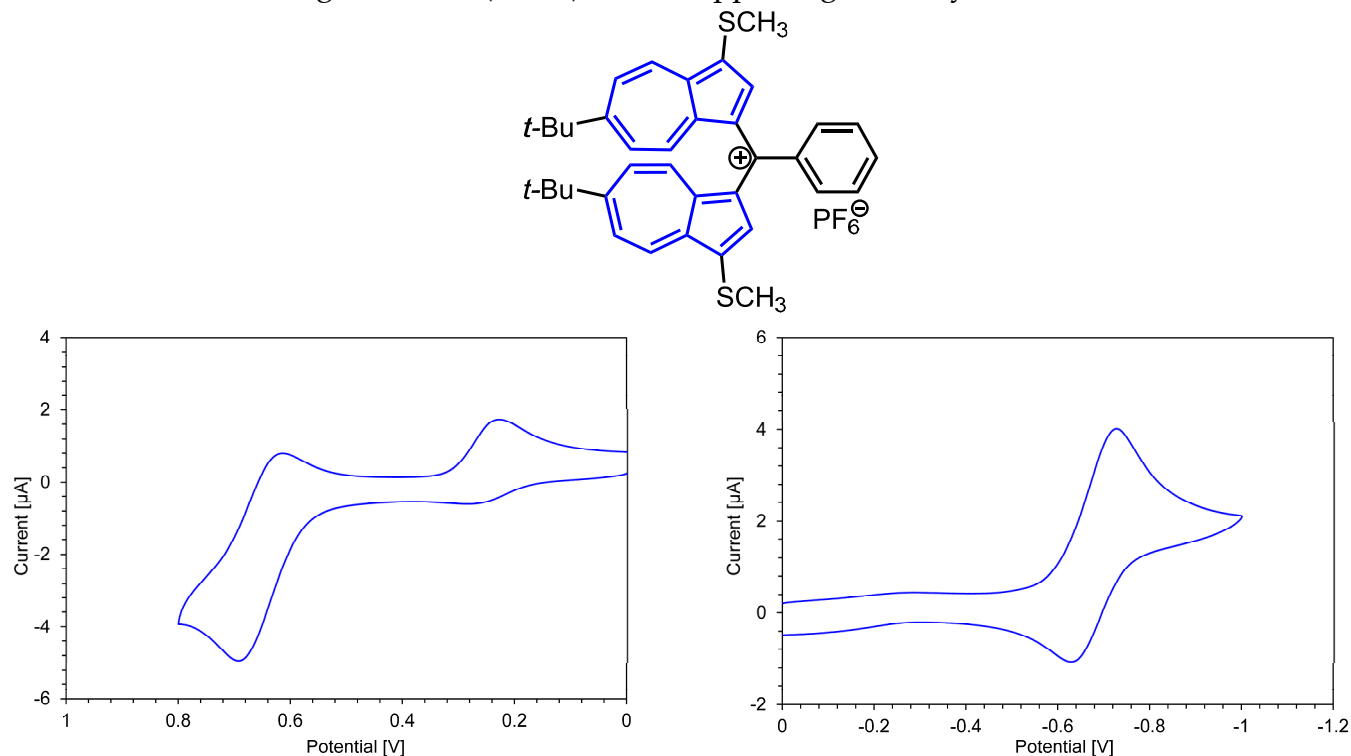

**Figure S21.** Cyclic voltammogram for oxidation (left) and reduction (right) of  $3b^{2+} \cdot 2PF_6^{-}$  (1 mM) in benzonitrile containing  $Et_4NClO_4$  (0.1 M) as the supporting electrolyte; scan rate =  $100 \text{ mVs}^{-1}$ .

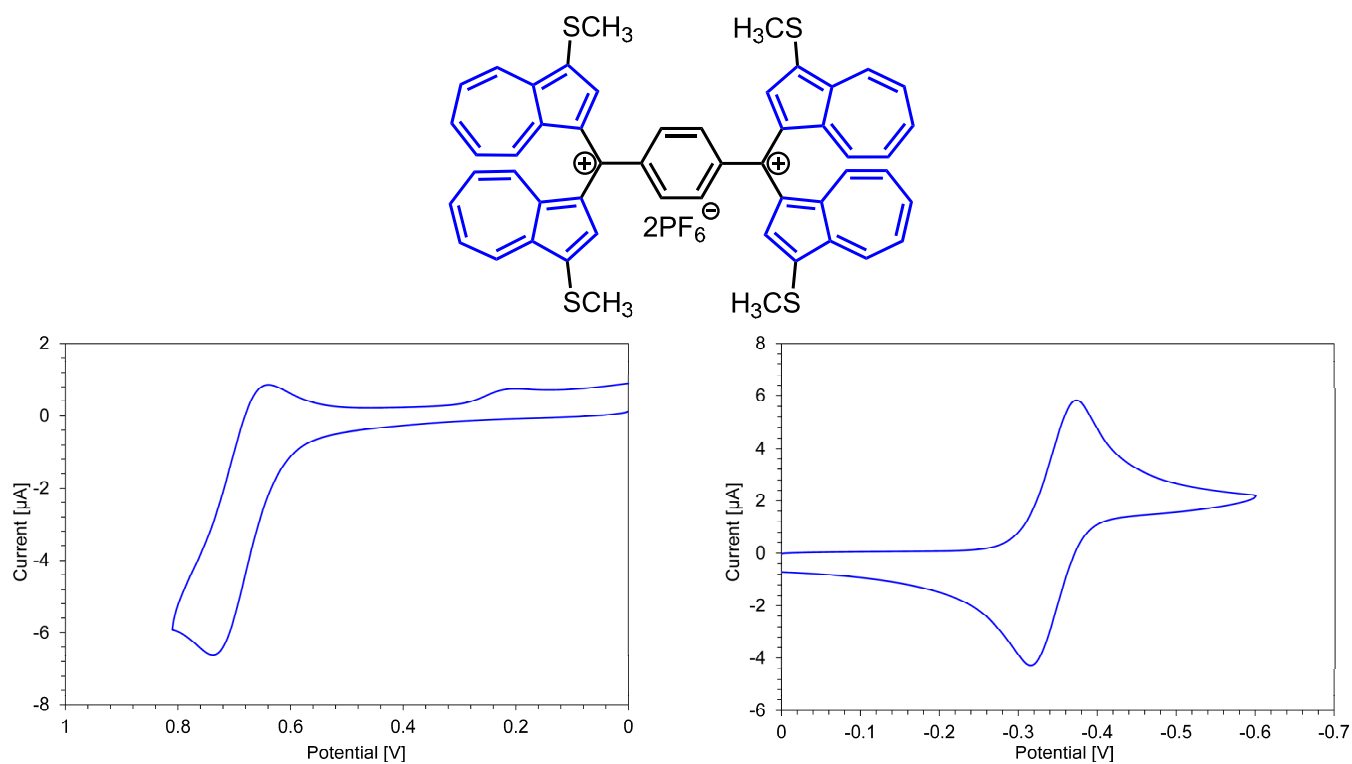

**Figure S22.** Cyclic voltammogram for oxidation (left) and reduction (right) of **4a** $\cdot\text{PF}_6^-$  (1 mM) in benzonitrile containing  $\text{Et}_4\text{NClO}_4$  (0.1 M) as the supporting electrolyte; scan rate =  $100 \text{ mVs}^{-1}$ .
